# Supplementary material for: The weather affects air conditioner purchases to fill the energy efficiency gap
Source: Springer Nature journal article supplement (doi:10.1038/s41467-022-33531-2), 2022-10-01
Supplement: MOESM1 [file 41467_2022_33531_MOESM1_ESM.pdf]

This is an Open Access document downloaded from ORCA, Cardiff University's institutional repository:<https://orca.cardiff.ac.uk/id/eprint/153022/>

This is the author's version of a work that was submitted to / accepted for publication.

Citation for final published version:

He, Pan , Liu, Pengfei, Qiu, Yueming (Lucy) and Liu, Lufan 2022. The weather affects air conditioner purchases to fill the energy efficiency gap. Nature Communications 13 (1) , 5772. 10.1038/s41467-022-33531-2

Publishers page: <https://doi.org/10.1038/s41467-022-33531-2>

Please note:

Changes made as a result of publishing processes such as copy-editing, formatting and page numbers may not be reflected in this version. For the definitive version of this publication, please refer to the published source. You are advised to consult the publisher's version if you wish to cite this paper.

This version is being made available in accordance with publisher policies. See <http://orca.cf.ac.uk/policies.html> for usage policies. Copyright and moral rights for publications made available in ORCA are retained by the copyright holders.

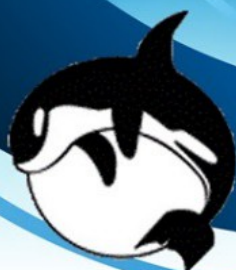

## Supplementary Information

### **The weather affects air conditioner purchases to fill the energy efficiency gap**

Pan He<sup>1</sup>, Pengfei Liu<sup>2,\*</sup>, Yueming (Lucy) Qiu<sup>3,\*</sup>, Lufan Liu<sup>2</sup>

1. School of Earth and Environmental Sciences, Cardiff University, Cardiff, UK

2. Department of Environmental and Natural Resource Economics, College of the Environment and Life Sciences, University of Rhode Island, Kingston, RI, USA

3. School of Public Policy, University of Maryland College Park, College Park, MD, 20742, USA

\* Corresponding authors: Liu [pengfei\\_liu@uri.edu](mailto:pengfei_liu@uri.edu) ; Qiu [yqiu16@umd.edu](mailto:yqiu16@umd.edu)

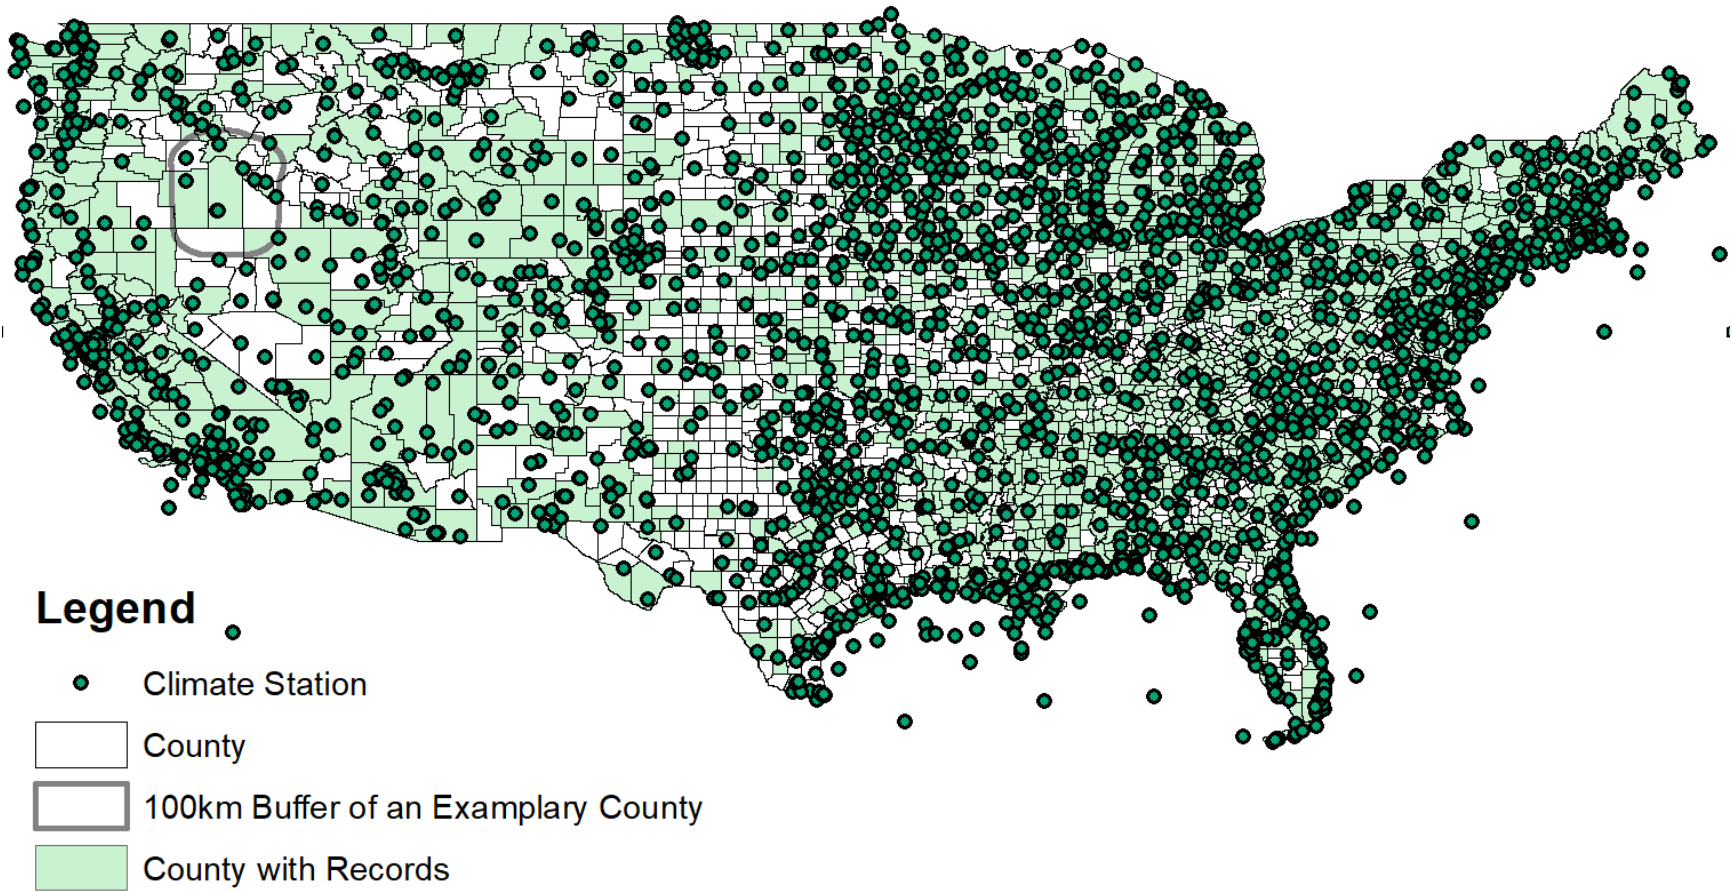

*Supplementary Figure 1 Climate stations and counties with records*

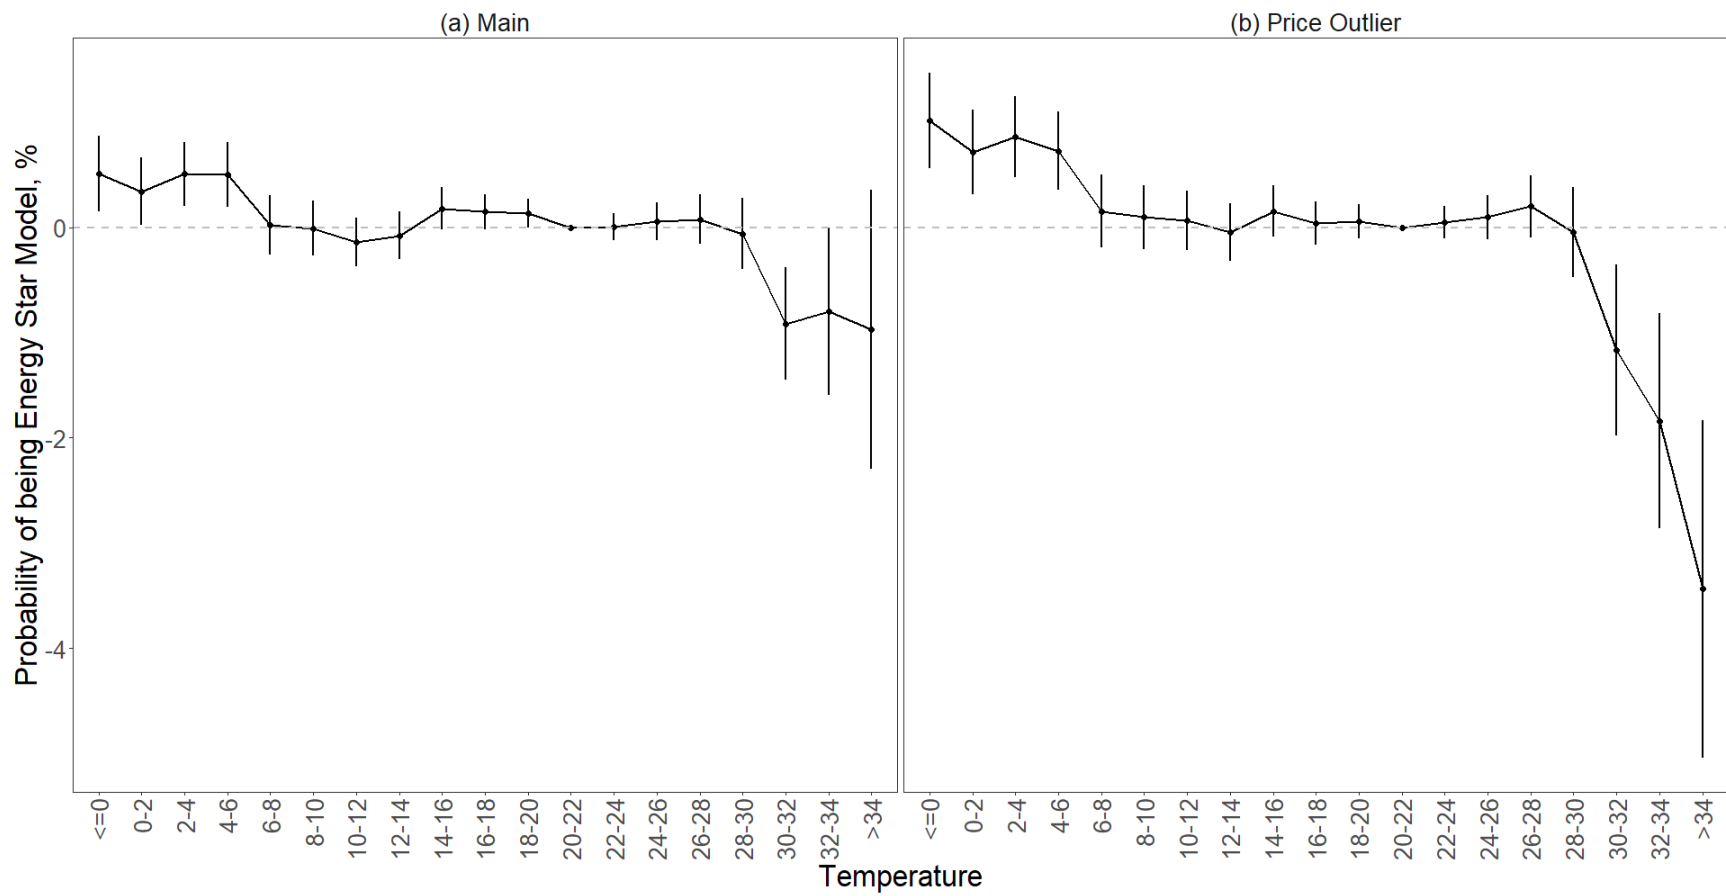

Supplementary Figure 2 The effect of temperature on Energy Star telephone purchase. a) Full sample (N=25395497). b) Records with price<\$10 dropped (N=19278726). All the sample sizes refer to transactions from the Nielsen Scanner Dataset. The vertical lines show the 95% confidence intervals (i.e. mean values +/- 2SEM).

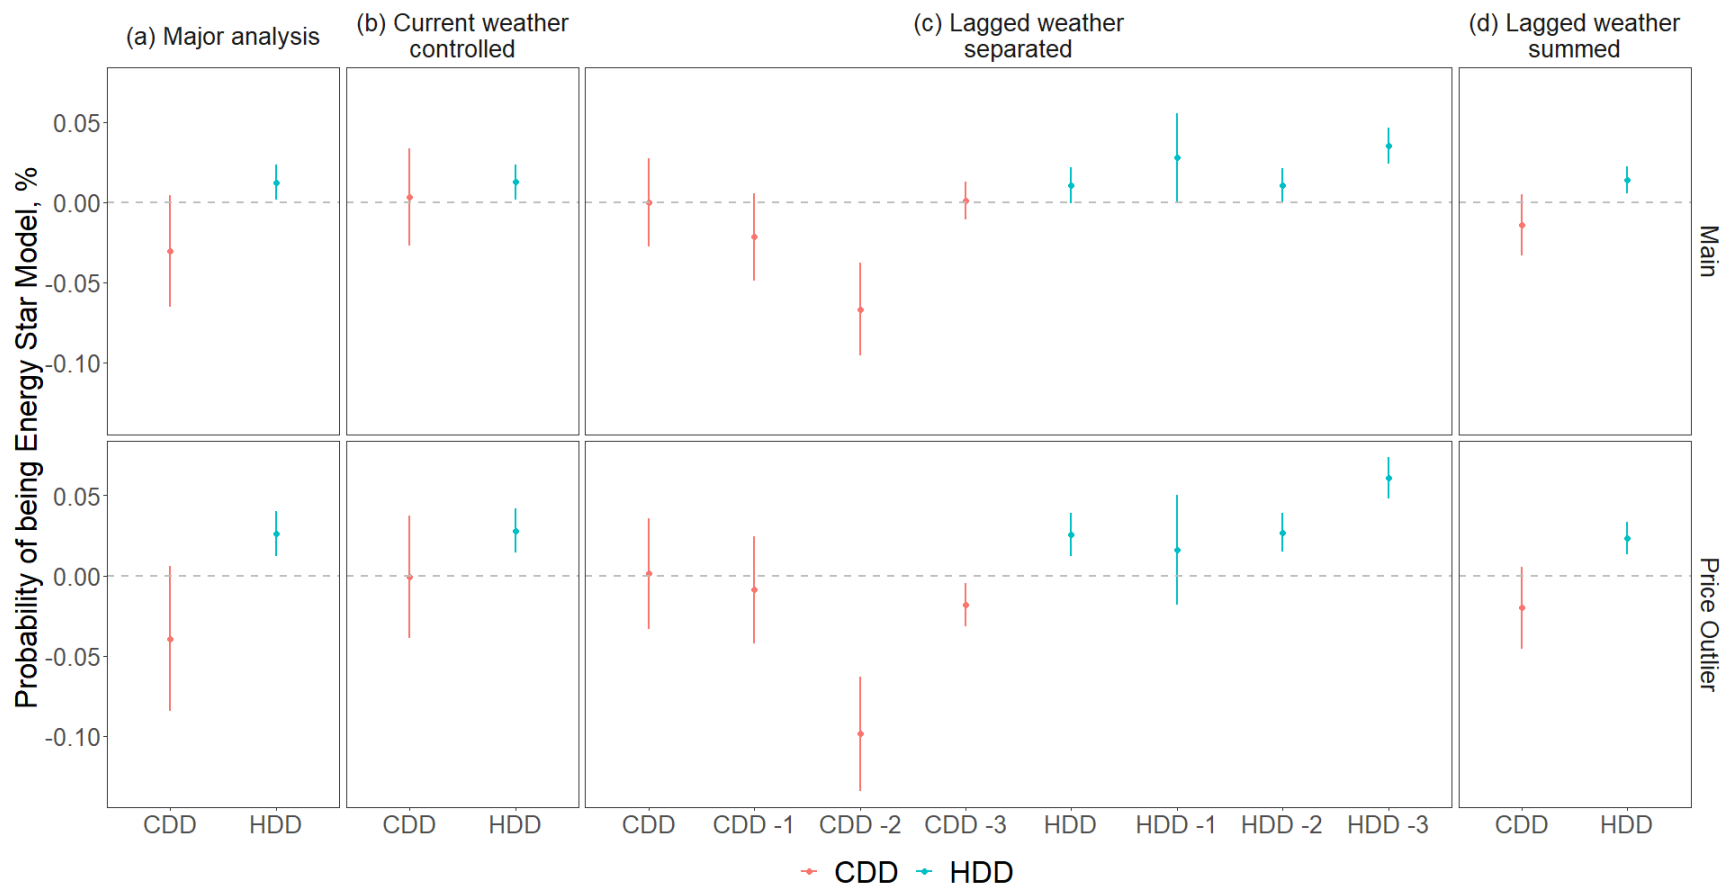

Supplementary Figure 3 The effect of temperature on Energy Star telephone purchase in terms of CDDs and HDDs. a) major analysis using the CDDs and HDDs in the previous week of transaction ( $N=25395497$  for the full sample,  $19278726$  for the records with price < \$10 dropped). b) controlling for the meteorological records in the week of transaction ( $N=25226932$  for the full sample,  $19157396$  for the records with price < \$10 dropped), c) controlling for the meteorological records lagged for 1, 2, and 3 weeks ( $N=24940700$  for the full sample,  $18951915$  for the records with price < \$10 dropped), d) impact of the summed CDDs and HDDs in the previous month of the transaction ( $N=24940700$  for the full sample,  $18951915$  for the records with price < \$10 dropped). All the sample sizes refer to transactions from the Nielsen Scanner Dataset. The vertical lines show the 95% confidence intervals (i.e. mean values  $\pm$  2SEM).

Supplementary Table 1 Descriptive statistics

|                                                          | N       | Mean     | SD       | Min      | Max      |
|----------------------------------------------------------|---------|----------|----------|----------|----------|
| Transaction level                                        |         |          |          |          |          |
| Price (\$)                                               | 2154198 | 175.44   | 87.114   | 0.01     | 699.99   |
| Energy Star                                              | 1608344 | 170.196  | 94.762   | 0.01     | 699.99   |
| Non- Energy Star                                         | 545854  | 190.892  | 56.31    | 0.01     | 649.99   |
| County level                                             |         |          |          |          |          |
| Temperature (°C)                                         | 1945092 | 19.841   | 5.011    | -21.036  | 40.5     |
| CDDs                                                     | 1945092 | 19.816   | 26.007   | 0        | 244.3    |
| HDDs                                                     | 1945092 | 35.818   | 45.042   | 0        | 531.05   |
| Wind speed (m/s)                                         | 1920585 | 2.914    | 0.934    | 0        | 21.8     |
| Precipitation (mm)                                       | 1944655 | 2.351    | 3.067    | 0        | 67.157   |
| Relative Humidity (%)                                    | 1883615 | 66.267   | 11.458   | 0.3      | 100      |
| Residential electricity price (\$/kwh)                   | 2154197 | 12.456   | 2.786    | 6.88     | 15.803   |
| CDDs, 1996-2005                                          | 2151620 | 8.753    | 8.337    | 0        | 70.325   |
| HDDs, 1996-2005                                          | 2151620 | 125.552  | 34.171   | 9.454    | 216.324  |
| Median annual household income (\$)                      | 1674221 | 6.70E+04 | 1.90E+04 | 2.00E+04 | 1.40E+05 |
| Population with bachelors above 25 (%)                   | 1674221 | 0.338    | 0.109    | 0.054    | 0.753    |
| Population of white (%)                                  | 1674221 | 0.733    | 0.179    | 0.155    | 0.998    |
| Median age (Years)                                       | 1674221 | 39.041   | 3.776    | 22.7     | 59.1     |
| Median number of rooms                                   | 1674221 | 5.557    | 0.696    | 3.3      | 7.7      |
| Owner : Renter (Ratio)                                   | 1674221 | 2.04     | 0.998    | 0.236    | 8.599    |
| Electricity as the heating fuel (%)                      | 1674221 | 0.234    | 0.197    | 0.012    | 0.975    |
| Population believing climate change happening            | 2151765 | 66.258   | 5.807    | 43.9     | 80       |
| Population believing climate change will harm the US (%) | 2151765 | 55.176   | 4.979    | 41.6     | 64.8     |
| Population worried about climate change (%)              | 2151765 | 55.597   | 6.694    | 37.9     | 70.3     |
| Population supporting renewable energy standards (%)     | 2151765 | 57.659   | 4.387    | 40.1     | 66.2     |
| Population supporting regulation of CO <sub>2</sub> as a | 2151765 | 69.246   | 3.836    | 49.8     | 77.9     |

|                                   |         |       |       |       |       |
|-----------------------------------|---------|-------|-------|-------|-------|
| pollutant (%)                     |         |       |       |       |       |
| Support Democrats in election (%) | 2151143 | 0.551 | 0.158 | 0.048 | 0.925 |

Supplementary Table 2 The effect of weather on Energy Star air conditioner and telephone purchase

|                                           | Air conditioner      |                      |            |            | Telephone           |                     |
|-------------------------------------------|----------------------|----------------------|------------|------------|---------------------|---------------------|
|                                           | (1)                  | (2)                  | (3)        | (4)        | (5)                 | (6)                 |
|                                           | EnergyStar           | EnergyStar           | EnergyStar | EnergyStar | EnergyStar          | EnergyStar          |
| Temperature interval (20-22°C by default) |                      |                      |            |            |                     |                     |
| <0°C                                      | -0.168***<br>(0.041) | -0.145***<br>(0.053) |            |            | 0.005***<br>(0.002) | 0.010***<br>(0.002) |
| 0-2°C                                     | -0.022<br>(0.020)    | -0.008<br>(0.022)    |            |            | 0.003**<br>(0.002)  | 0.007***<br>(0.002) |
| 2-4°C                                     | -0.012<br>(0.016)    | -0.000<br>(0.017)    |            |            | 0.005***<br>(0.002) | 0.009***<br>(0.002) |
| 4-6°C                                     | 0.014<br>(0.011)     | 0.025**<br>(0.012)   |            |            | 0.005***<br>(0.002) | 0.007***<br>(0.002) |
| 6-8°C                                     | 0.030***<br>(0.010)  | 0.040***<br>(0.011)  |            |            | 0.000<br>(0.001)    | 0.002<br>(0.002)    |
| 8-10°C                                    | 0.004<br>(0.007)     | 0.008<br>(0.008)     |            |            | -0.000<br>(0.001)   | 0.001<br>(0.002)    |
| 10-12°C                                   | 0.017***<br>(0.005)  | 0.023***<br>(0.006)  |            |            | -0.001<br>(0.001)   | 0.001<br>(0.001)    |
| 12-14°C                                   | 0.012**<br>(0.005)   | 0.017***<br>(0.005)  |            |            | -0.001<br>(0.001)   | -0.000<br>(0.001)   |
| 14-16°C                                   | 0.006<br>(0.004)     | 0.001<br>(0.005)     |            |            | 0.002*<br>(0.001)   | 0.002<br>(0.001)    |
| 16-18°C                                   | 0.007**<br>(0.003)   | 0.009**<br>(0.004)   |            |            | 0.001*<br>(0.001)   | 0.000<br>(0.001)    |
| 18-20°C                                   | 0.007**<br>(0.003)   | 0.009**<br>(0.004)   |            |            | 0.001*<br>(0.001)   | 0.001<br>(0.001)    |
| 22-24°C                                   | -0.001               | 0.005                |            |            | 0.000               | 0.000               |

|                                |           |           |           |           |           |           |
|--------------------------------|-----------|-----------|-----------|-----------|-----------|-----------|
|                                | (0.003)   | (0.003)   |           |           | (0.001)   | (0.001)   |
| 24-26°C                        | 0.025***  | 0.028***  |           |           | 0.001     | 0.001     |
|                                | (0.004)   | (0.005)   |           |           | (0.001)   | (0.001)   |
| 26-28°C                        | 0.025***  | 0.027***  |           |           | 0.001     | 0.002     |
|                                | (0.005)   | (0.006)   |           |           | (0.001)   | (0.001)   |
| 28-30°C                        | 0.027***  | 0.031***  |           |           | -0.001    | -0.000    |
|                                | (0.006)   | (0.007)   |           |           | (0.002)   | (0.002)   |
| 30-32°C                        | 0.022***  | 0.029***  |           |           | -0.009*** | -0.012*** |
|                                | (0.008)   | (0.010)   |           |           | (0.003)   | (0.004)   |
| 32-34°C                        | 0.057***  | 0.072***  |           |           | -0.008**  | -0.018*** |
|                                | (0.014)   | (0.018)   |           |           | (0.004)   | (0.005)   |
| >34°C                          | 0.055***  | 0.071***  |           |           | -0.010    | -0.034*** |
|                                | (0.019)   | (0.021)   |           |           | (0.007)   | (0.008)   |
| Temperature-21°C               |           |           | 0.004***  | 0.005***  |           |           |
|                                |           |           | (0.001)   | (0.001)   |           |           |
| 21°C-Temperature               |           |           | 0.002***  | 0.002***  |           |           |
|                                |           |           | (0.001)   | (0.001)   |           |           |
| Wind speed                     | -0.002    | -0.002    | -0.002    | -0.002    | 0.000     | 0.002***  |
|                                | (0.002)   | (0.002)   | (0.002)   | (0.002)   | (0.000)   | (0.001)   |
| Precipitation                  | -0.001*** | -0.002*** | -0.001*** | -0.002*** | -0.000    | 0.000*    |
|                                | (0.000)   | (0.000)   | (0.000)   | (0.000)   | (0.000)   | (0.000)   |
| Relative humidity              | -0.006    | -0.011*   | -0.005    | -0.010    | -0.002*   | -0.001    |
|                                | (0.005)   | (0.006)   | (0.005)   | (0.006)   | (0.001)   | (0.002)   |
| Relative humidity <sup>2</sup> | 0.001*    | 0.001***  | 0.001     | 0.001***  | 0.000**   | 0.000     |
|                                | (0.000)   | (0.000)   | (0.000)   | (0.000)   | (0.000)   | (0.000)   |
| Inprice                        | 0.097***  | 0.006     | 0.097***  | 0.006     | 0.238***  | 0.226***  |
|                                | (0.005)   | (0.016)   | (0.005)   | (0.016)   | (0.001)   | (0.002)   |
| Fixed effects                  |           |           |           |           |           |           |
| County*week                    | Y         | Y         | Y         | Y         | Y         | Y         |
| State*year*month               | Y         | Y         | Y         | Y         | Y         | Y         |
| N                              | 1871472   | 1564506   | 1871472   | 1564506   | 25395497  | 19278726  |
| R <sup>2</sup>                 | 0.187     | 0.196     | 0.187     | 0.196     | 0.453     | 0.383     |



Notes: Standard errors in parentheses are clustered to store level. Results weighted by the units sold per transaction. \* p<0.1, \*\* p<0.05, \*\*\* p<0.01. The relative humidity multiplied by 10.

Supplementary Table 3 The effect of temperature on Energy Star air conditioner purchase in terms of CDDs and HDDs

|                    | Major analysis      |                     | Current climate controlled |                      | Lagged climate separated |                      | Lagged climate summed |                     |
|--------------------|---------------------|---------------------|----------------------------|----------------------|--------------------------|----------------------|-----------------------|---------------------|
|                    | (1)                 | (2)                 | (3)                        | (4)                  | (5)                      | (6)                  | (7)                   | (8)                 |
|                    | Main                | Price<br>Outlier    | Main                       | Price<br>Outlier     | Main                     | Price<br>Outlier     | Main                  | Price<br>Outlier    |
| CDD                | 0.004***<br>(0.001) | 0.005***<br>(0.001) | 0.004***<br>(0.001)        | 0.004***<br>(0.001)  | 0.005***<br>(0.001)      | 0.005***<br>(0.001)  |                       |                     |
| CDD, current week  |                     |                     | -0.001<br>(0.001)          | -0.001<br>(0.001)    |                          |                      |                       |                     |
| CDD, lagged 1 week |                     |                     |                            |                      | -0.000<br>(0.001)        | -0.003***<br>(0.001) |                       |                     |
| CDD, lagged 2 week |                     |                     |                            |                      | -0.001<br>(0.001)        | 0.001<br>(0.001)     |                       |                     |
| CDD, lagged 3 week |                     |                     |                            |                      | 0.001*<br>(0.001)        | 0.003***<br>(0.001)  |                       |                     |
| CDD, 1 month       |                     |                     |                            |                      |                          |                      | 0.001***<br>(0.000)   | 0.001***<br>(0.000) |
| HDD                | 0.002***<br>(0.000) | 0.002***<br>(0.000) | 0.001***<br>(0.000)        | 0.001**<br>(0.000)   | 0.002***<br>(0.000)      | 0.002***<br>(0.000)  |                       |                     |
| HDD, current week  |                     |                     | -0.003***<br>(0.000)       | -0.003***<br>(0.001) |                          |                      |                       |                     |
| HDD, lagged 1 week |                     |                     |                            |                      | -0.000<br>(0.000)        | -0.001***<br>(0.000) |                       |                     |
| HDD, lagged 2 week |                     |                     |                            |                      | 0.001***<br>(0.000)      | 0.000<br>(0.000)     |                       |                     |
| HDD, lagged 3 week |                     |                     |                            |                      | -0.000<br>(0.000)        | -0.001**<br>(0.000)  |                       |                     |
| HDD, 1 month       |                     |                     |                            |                      |                          |                      | 0.001***              | -0.000**            |

|                              |           |           |           |           |           |           |         |         |
|------------------------------|-----------|-----------|-----------|-----------|-----------|-----------|---------|---------|
| Wind speed                   | -0.003*   | -0.002    | -0.001    | -0.000    | -0.002*   | -0.002*   | (0.000) | (0.000) |
|                              | (0.002)   | (0.002)   | (0.001)   | (0.002)   | (0.001)   | (0.001)   |         |         |
| Wind speed, current week     |           |           | -0.002    | -0.004**  |           |           |         |         |
|                              |           |           | (0.001)   | (0.002)   |           |           |         |         |
| Wind speed, lagged 1 week    |           |           |           |           | 0.003***  | 0.007***  |         |         |
|                              |           |           |           |           | (0.001)   | (0.001)   |         |         |
| Wind speed, lagged 2 week    |           |           |           |           | 0.001     | 0.004***  |         |         |
|                              |           |           |           |           | (0.001)   | (0.001)   |         |         |
| Wind speed, lagged 3 week    |           |           |           |           | -0.004*** | -0.008*** |         |         |
|                              |           |           |           |           | (0.001)   | (0.002)   |         |         |
| Wind speed, 1 month          |           |           |           |           |           |           | -0.002  | 0.000   |
|                              |           |           |           |           |           |           | (0.003) | (0.003) |
| Precipitation                | -0.001*** | -0.002*** | -0.001*** | -0.002*** | -0.001*** | -0.002*** |         |         |
|                              | (0.000)   | (0.000)   | (0.000)   | (0.000)   | (0.000)   | (0.000)   |         |         |
| Precipitation, current week  |           |           | -0.000    | 0.001     |           |           |         |         |
|                              |           |           | (0.000)   | (0.000)   |           |           |         |         |
| Precipitation, lagged 1 week |           |           |           |           | 0.001**   | 0.000     |         |         |
|                              |           |           |           |           | (0.000)   | (0.000)   |         |         |
| Precipitation, lagged 2 week |           |           |           |           | -0.000    | 0.000     |         |         |
|                              |           |           |           |           | (0.000)   | (0.000)   |         |         |
| Precipitation, lagged 3 week |           |           |           |           | -0.001**  | -0.000    |         |         |
|                              |           |           |           |           | (0.000)   | (0.000)   |         |         |
| Precipitation, 1 month       |           |           |           |           |           |           | -0.001  | -0.001* |
|                              |           |           |           |           |           |           | (0.001) | (0.001) |
| Relative humidity            | -0.005    | -0.011*   | -0.007    | -0.012*   | -0.014*** | -0.015**  |         |         |

|                                                |                   |                     |                      |                      |                      |                      |                   |                   |
|------------------------------------------------|-------------------|---------------------|----------------------|----------------------|----------------------|----------------------|-------------------|-------------------|
|                                                | (0.005)           | (0.006)             | (0.005)              | (0.006)              | (0.005)              | (0.006)              |                   |                   |
| Relative humidity, current week                |                   |                     | 0.022***<br>(0.005)  | 0.028***<br>(0.007)  |                      |                      |                   |                   |
| Relative humidity, lagged 1 week               |                   |                     |                      |                      | -0.011*<br>(0.006)   | -0.008<br>(0.007)    |                   |                   |
| Relative humidity, lagged 2 week               |                   |                     |                      |                      | 0.035***<br>(0.006)  | 0.032***<br>(0.007)  |                   |                   |
| Relative humidity, lagged 3 week               |                   |                     |                      |                      | 0.016***<br>(0.005)  | 0.029***<br>(0.007)  |                   |                   |
| Relative humidity, 1 month                     |                   |                     |                      |                      |                      |                      | 0.005<br>(0.010)  | 0.021*<br>(0.013) |
| Relative humidity <sup>2</sup>                 | 0.001*<br>(0.000) | 0.002***<br>(0.000) | 0.001**<br>(0.000)   | 0.002***<br>(0.000)  | 0.001***<br>(0.000)  | 0.002***<br>(0.000)  |                   |                   |
| Relative humidity <sup>2</sup> , current week  |                   |                     | -0.002***<br>(0.000) | -0.003***<br>(0.001) |                      |                      |                   |                   |
| Relative humidity <sup>2</sup> , lagged 1 week |                   |                     |                      |                      | 0.001**<br>(0.001)   | 0.001<br>(0.001)     |                   |                   |
| Relative humidity <sup>2</sup> , lagged 2 week |                   |                     |                      |                      | -0.003***<br>(0.000) | -0.003***<br>(0.001) |                   |                   |
| Relative humidity <sup>2</sup> , lagged 3 week |                   |                     |                      |                      | -0.001**<br>(0.000)  | -0.002***<br>(0.001) |                   |                   |
| Relative humidity <sup>2</sup> , 1 month       |                   |                     |                      |                      |                      |                      | -0.000<br>(0.001) | -0.001<br>(0.001) |

|                  |                     |                  |                     |                  |                     |                  |                     |                  |
|------------------|---------------------|------------------|---------------------|------------------|---------------------|------------------|---------------------|------------------|
| Inprice          | 0.097***<br>(0.005) | 0.006<br>(0.016) | 0.097***<br>(0.005) | 0.006<br>(0.016) | 0.097***<br>(0.005) | 0.005<br>(0.016) | 0.097***<br>(0.005) | 0.005<br>(0.016) |
| Fixed effects    |                     |                  |                     |                  |                     |                  |                     |                  |
| County*week      | Y                   | Y                | Y                   | Y                | Y                   | Y                | Y                   | Y                |
| State*year*month | Y                   | Y                | Y                   | Y                | Y                   | Y                | Y                   | Y                |
| N                | 1871472             | 1564506          | 1868326             | 1561994          | 1862247             | 1557351          | 1862247             | 1557351          |
| R <sup>2</sup>   | 0.187               | 0.196            | 0.188               | 0.196            | 0.188               | 0.196            | 0.187               | 0.196            |

Notes: Standard errors in parentheses are clustered to store level. Results weighted by the units sold per transaction. \* p<0.1, \*\* p<0.05, \*\*\* p<0.01. The CDD, HDD, and relative humidity multiplied by 10.

*Supplementary Table 4 Robustness check, 18°C as reference point*

|         | (1)<br>Main          | (2)<br>Price Outlier | (1)<br>Main | (2)<br>Price Outlier |
|---------|----------------------|----------------------|-------------|----------------------|
| <0°C    | -0.007**<br>(0.003)  | -0.009**<br>(0.004)  |             |                      |
| 0-2°C   | -0.175***<br>(0.041) | -0.154***<br>(0.053) |             |                      |
| 2-4°C   | -0.029<br>(0.019)    | -0.016<br>(0.021)    |             |                      |
| 4-6°C   | -0.018<br>(0.015)    | -0.009<br>(0.016)    |             |                      |
| 6-8°C   | 0.007<br>(0.010)     | 0.017<br>(0.011)     |             |                      |
| 8-10°C  | 0.023***<br>(0.009)  | 0.031***<br>(0.010)  |             |                      |
| 10-12°C | -0.003<br>(0.006)    | -0.001<br>(0.007)    |             |                      |
| 12-14°C | 0.011**<br>(0.004)   | 0.015***<br>(0.005)  |             |                      |
| 14-16°C | 0.005<br>(0.004)     | 0.008**<br>(0.004)   |             |                      |
| 18-20°C | -0.001               | -0.008**             |             |                      |

---

|                                |           |           |           |           |
|--------------------------------|-----------|-----------|-----------|-----------|
|                                | (0.003)   | (0.004)   |           |           |
| 20-22°C                        | -0.000    | 0.000     |           |           |
|                                | (0.003)   | (0.003)   |           |           |
| 22-24°C                        | -0.008**  | -0.003    |           |           |
|                                | (0.004)   | (0.005)   |           |           |
| 24-26°C                        | 0.018***  | 0.019***  |           |           |
|                                | (0.005)   | (0.006)   |           |           |
| 26-28°C                        | 0.018***  | 0.018***  |           |           |
|                                | (0.006)   | (0.007)   |           |           |
| 28-30°C                        | 0.020***  | 0.022***  |           |           |
|                                | (0.006)   | (0.007)   |           |           |
| 30-32°C                        | 0.015*    | 0.020*    |           |           |
|                                | (0.009)   | (0.010)   |           |           |
| 32-34°C                        | 0.050***  | 0.063***  |           |           |
|                                | (0.014)   | (0.018)   |           |           |
| >34°C                          | 0.048**   | 0.063***  |           |           |
|                                | (0.019)   | (0.021)   |           |           |
| CDD, 65 °F                     |           |           | 0.002***  | 0.003***  |
|                                |           |           | (0.000)   | (0.001)   |
| HDD, 65 °F                     |           |           | 0.002***  | 0.003***  |
|                                |           |           | (0.000)   | (0.001)   |
| Wind speed                     | -0.002    | -0.002    | -0.002    | -0.002    |
|                                | (0.002)   | (0.002)   | (0.002)   | (0.002)   |
| Precipitation                  | -0.001*** | -0.002*** | -0.001*** | -0.002*** |
|                                | (0.000)   | (0.000)   | (0.000)   | (0.000)   |
| Relative humidity              | -0.006    | -0.011*   | -0.008    | -0.012*   |
|                                | (0.005)   | (0.006)   | (0.005)   | (0.006)   |
| Relative humidity <sup>2</sup> | 0.001*    | 0.001***  | 0.001**   | 0.002***  |
|                                | (0.000)   | (0.000)   | (0.000)   | (0.000)   |
| lnprice                        | 0.097***  | 0.006     | 0.097***  | 0.006     |
|                                | (0.005)   | (0.016)   | (0.005)   | (0.016)   |

---

| Fixed effects    |         |         |         |         |
|------------------|---------|---------|---------|---------|
| County*week      | Y       | Y       | Y       | Y       |
| State*year*month | Y       | Y       | Y       | Y       |
| N                | 1871472 | 1564506 | 1871472 | 1564506 |
| R <sup>2</sup>   | 0.187   | 0.196   | 0.187   | 0.196   |

Notes: Standard errors in parentheses are clustered to store level. Results weighted by the units sold per transaction. \* p<0.1, \*\* p<0.05, \*\*\* p<0.01. The CDD, HDD, and relative humidity multiplied by 10.

*Supplementary Table 5 Robustness check, nonlinear effect of meteorological indicators*

|                                      | (1)                  | (2)                  | (3)                  | (4)                  |
|--------------------------------------|----------------------|----------------------|----------------------|----------------------|
|                                      | Main                 | Price Outlier        | Main                 | Price Outlier        |
| (Temperature-21°C)/10                | 0.050***<br>(0.013)  | 0.052***<br>(0.016)  | 0.050***<br>(0.013)  | 0.052***<br>(0.016)  |
| (Temperature-21°C) <sup>2</sup> /100 | -0.005<br>(0.014)    | -0.002<br>(0.017)    | -0.005<br>(0.014)    | -0.002<br>(0.017)    |
| (21°C-Temperature)/10                | 0.040***<br>(0.010)  | 0.027**<br>(0.011)   | 0.040***<br>(0.010)  | 0.027**<br>(0.012)   |
| (21°C-Temperature) <sup>2</sup> /100 | -0.021***<br>(0.007) | -0.009<br>(0.008)    | -0.021***<br>(0.007) | -0.009<br>(0.008)    |
| Wind speed                           | -0.002<br>(0.002)    | -0.002<br>(0.002)    | -0.003<br>(0.005)    | -0.001<br>(0.005)    |
| Wind speed <sup>2</sup>              |                      |                      | 0.000<br>(0.001)     | -0.000<br>(0.001)    |
| Precipitation                        | -0.001***<br>(0.000) | -0.002***<br>(0.000) | -0.001**<br>(0.001)  | -0.002***<br>(0.001) |
| Precipitation <sup>2</sup>           |                      |                      | 0.000<br>(0.000)     | 0.000<br>(0.000)     |
| Relative humidity                    | -0.005<br>(0.005)    | -0.010<br>(0.006)    | -0.005<br>(0.005)    | -0.010<br>(0.006)    |
| Relative humidity <sup>2</sup>       | 0.001<br>(0.000)     | 0.001***<br>(0.000)  | 0.001<br>(0.000)     | 0.001***<br>(0.000)  |

|                  |                     |                  |                     |                  |
|------------------|---------------------|------------------|---------------------|------------------|
| Inprice          | 0.097***<br>(0.005) | 0.006<br>(0.016) | 0.097***<br>(0.005) | 0.006<br>(0.016) |
| Fixed effects    |                     |                  |                     |                  |
| County*week      | Y                   | Y                | Y                   | Y                |
| State*year*month | Y                   | Y                | Y                   | Y                |
| N                | 1871472             | 1564506          | 1871472             | 1564506          |
| R-sq             | 0.187               | 0.196            | 0.187               | 0.196            |

Notes: Standard errors in parentheses are clustered to store level. Results weighted by the units sold per transaction. \* p<0.1, \*\* p<0.05, \*\*\* p<0.01. The relative humidity multiplied by 10.

*Supplementary Table 6 Robustness check, different levels of clustering*

|                                | (1)<br>County        | (2)<br>Zip Code, 3 digit | (3)<br>Nielsen Designated<br>Market Areas |
|--------------------------------|----------------------|--------------------------|-------------------------------------------|
| CDD                            | 0.004***<br>(0.001)  | 0.004***<br>(0.001)      | 0.004***<br>(0.001)                       |
| HDD                            | 0.002***<br>(0.000)  | 0.002***<br>(0.000)      | 0.002***<br>(0.001)                       |
| Wind speed                     | -0.003<br>(0.002)    | -0.003<br>(0.002)        | -0.003<br>(0.003)                         |
| Precipitation                  | -0.001***<br>(0.000) | -0.001***<br>(0.000)     | -0.001***<br>(0.000)                      |
| Relative humidity              | -0.005<br>(0.007)    | -0.005<br>(0.006)        | -0.005<br>(0.011)                         |
| Relative humidity <sup>2</sup> | 0.001<br>(0.001)     | 0.001<br>(0.001)         | 0.001<br>(0.001)                          |
| Inprice                        | 0.097***<br>(0.008)  | 0.097***<br>(0.008)      | 0.097***<br>(0.015)                       |
| Fixed effects                  |                      |                          |                                           |
| County*week                    | Y                    | Y                        | Y                                         |
| State*year*month               | Y                    | Y                        | Y                                         |

|                |         |         |         |
|----------------|---------|---------|---------|
| N              | 1871472 | 1871472 | 1871472 |
| R <sup>2</sup> | 0.187   | 0.187   | 0.187   |

Notes: Results weighted by the units sold per transaction. \* p<0.1, \*\* p<0.05, \*\*\* p<0.01. The CDD, HDD, and relative humidity multiplied by 10.

Supplementary Table 7 Robustness check, alternative combinations of fixed effects

|                                | (1)                  | (2)                  | (3)                  | (4)                  | (5)                  |
|--------------------------------|----------------------|----------------------|----------------------|----------------------|----------------------|
|                                | EnergyStar           | EnergyStar           | EnergyStar           | EnergyStar           | EnergyStar           |
| CDD                            | 0.002***<br>(0.001)  | 0.003***<br>(0.001)  | 0.003***<br>(0.001)  | 0.003***<br>(0.001)  | 0.002***<br>(0.001)  |
| HDD                            | 0.001***<br>(0.000)  | 0.002***<br>(0.000)  | 0.002***<br>(0.000)  | 0.001***<br>(0.000)  | 0.002***<br>(0.000)  |
| Wind speed                     | 0.006***<br>(0.002)  | 0.007***<br>(0.002)  | 0.006***<br>(0.002)  | 0.006***<br>(0.002)  | 0.004**<br>(0.002)   |
| Precipitation                  | -0.002***<br>(0.000) | -0.002***<br>(0.000) | -0.002***<br>(0.000) | -0.002***<br>(0.000) | -0.002***<br>(0.000) |
| Relative humidity              | -0.014***<br>(0.005) | -0.015***<br>(0.005) | -0.015***<br>(0.005) | -0.013***<br>(0.005) | -0.010**<br>(0.004)  |
| Relative humidity <sup>2</sup> | 0.002***<br>(0.000)  | 0.002***<br>(0.000)  | 0.002***<br>(0.000)  | 0.002***<br>(0.000)  | 0.001***<br>(0.000)  |
| Inprice                        | 0.099***<br>(0.005)  | 0.100***<br>(0.005)  | 0.100***<br>(0.005)  | 0.100***<br>(0.005)  | 0.096***<br>(0.005)  |
| Fixed effects                  |                      |                      |                      |                      |                      |
| County*week                    |                      | Y                    | Y                    | Y                    | Y                    |
| County*month                   | Y                    |                      |                      |                      |                      |
| State*year                     |                      |                      |                      |                      | Y                    |
| State*month                    |                      |                      |                      | Y                    |                      |
| State                          | Y                    | Y                    | Y                    |                      |                      |
| Year                           | Y                    | Y                    | Y                    | Y                    |                      |
| Month                          |                      |                      | Y                    |                      | Y                    |
| Week                           | Y                    |                      |                      |                      |                      |



|                |         |         |         |         |         |
|----------------|---------|---------|---------|---------|---------|
| N              | 1879080 | 1871984 | 1871984 | 1871982 | 1871981 |
| R <sup>2</sup> | 0.128   | 0.144   | 0.144   | 0.146   | 0.169   |

Notes: Standard errors in parentheses are clustered to store level. Results weighted by the units sold per transaction. \* p<0.1, \*\* p<0.05, \*\*\* p<0.01. The CDD, HDD, and relative humidity multiplied by 10.

*Supplementary Table 8 The effect of weather on air conditioner price*

|                                | (1)                  | (2)                  |
|--------------------------------|----------------------|----------------------|
|                                | Main                 | Price Outlier        |
| EnergyStar                     | 0.285***<br>(0.048)  | 0.203***<br>(0.053)  |
| CDD                            | -0.001<br>(0.001)    | -0.004***<br>(0.001) |
| EnergyStar*CDD                 | -0.010***<br>(0.001) | 0.006***<br>(0.002)  |
| HDD                            | 0.002***<br>(0.001)  | 0.001***<br>(0.000)  |
| EnergyStar*HDD                 | -0.008***<br>(0.001) | -0.003***<br>(0.001) |
| Wind speed                     | 0.004<br>(0.002)     | 0.012***<br>(0.003)  |
| EnergyStar*Wind speed          | -0.016***<br>(0.005) | -0.039***<br>(0.007) |
| Precipitation                  | -0.000<br>(0.000)    | -0.000<br>(0.001)    |
| EnergyStar*Precipitation       | 0.003***<br>(0.001)  | 0.001<br>(0.001)     |
| Relative humidity              | -0.036***<br>(0.009) | -0.024***<br>(0.008) |
| EnergyStar*Relative humidity   | -0.016<br>(0.014)    | -0.012<br>(0.015)    |
| Relative humidity <sup>2</sup> | 0.003***             | 0.003***             |



|                              |                   |                     |                    |                     |                     |                      |                     |                     |
|------------------------------|-------------------|---------------------|--------------------|---------------------|---------------------|----------------------|---------------------|---------------------|
| HDD, current week            |                   |                     | 0.000<br>(0.000)   | -0.000<br>(0.000)   |                     |                      |                     |                     |
| HDD, lagged 1 week           |                   |                     |                    |                     | 0.000*<br>(0.000)   | 0.000***<br>(0.000)  |                     |                     |
| HDD, lagged 2 week           |                   |                     |                    |                     | 0.000<br>(0.000)    | -0.000***<br>(0.000) |                     |                     |
| HDD, lagged 3 week           |                   |                     |                    |                     | 0.000***<br>(0.000) | 0.001***<br>(0.000)  |                     |                     |
| HDD, 1 month                 |                   |                     |                    |                     |                     |                      | 0.000***<br>(0.000) | 0.000***<br>(0.000) |
| Wind speed                   | -0.000<br>(0.000) | 0.002***<br>(0.001) | 0.000<br>(0.000)   | 0.002***<br>(0.000) | -0.000<br>(0.000)   | 0.001***<br>(0.000)  |                     |                     |
| Wind speed, current week     |                   |                     | -0.000<br>(0.000)  | 0.000<br>(0.000)    |                     |                      |                     |                     |
| Wind speed, lagged 1 week    |                   |                     |                    |                     | 0.001***<br>(0.000) | 0.001***<br>(0.000)  |                     |                     |
| Wind speed, lagged 2 week    |                   |                     |                    |                     | 0.001**<br>(0.000)  | 0.001***<br>(0.000)  |                     |                     |
| Wind speed, lagged 3 week    |                   |                     |                    |                     | -0.000<br>(0.000)   | -0.000<br>(0.000)    |                     |                     |
| Wind speed, 1 month          |                   |                     |                    |                     |                     |                      | 0.001<br>(0.001)    | 0.003***<br>(0.001) |
| Precipitation                | -0.000<br>(0.000) | 0.000*<br>(0.000)   | -0.000*<br>(0.000) | 0.000*<br>(0.000)   | -0.000<br>(0.000)   | 0.000**<br>(0.000)   |                     |                     |
| Precipitation, current week  |                   |                     | 0.000<br>(0.000)   | 0.000**<br>(0.000)  |                     |                      |                     |                     |
| Precipitation, lagged 1 week |                   |                     |                    |                     | 0.000<br>(0.000)    | 0.000***<br>(0.000)  |                     |                     |

---

|                                                |                    |                   |                     |                   |                      |                      |                    |                  |
|------------------------------------------------|--------------------|-------------------|---------------------|-------------------|----------------------|----------------------|--------------------|------------------|
| Precipitation, lagged 2 week                   |                    |                   |                     |                   | -0.000**<br>(0.000)  | -0.000**<br>(0.000)  |                    |                  |
| Precipitation, lagged 3 week                   |                    |                   |                     |                   | -0.000***<br>(0.000) | -0.000**<br>(0.000)  |                    |                  |
| Precipitation, 1 month                         |                    |                   |                     |                   |                      |                      | -0.000*<br>(0.000) | 0.000<br>(0.000) |
| Relative humidity                              | -0.002<br>(0.001)  | -0.000<br>(0.002) | -0.003**<br>(0.001) | -0.001<br>(0.002) | -0.002**<br>(0.001)  | -0.001<br>(0.002)    |                    |                  |
| Relative humidity, current week                |                    |                   | -0.002*<br>(0.001)  | 0.001<br>(0.002)  |                      |                      |                    |                  |
| Relative humidity, lagged 1 week               |                    |                   |                     |                   | 0.006***<br>(0.001)  | 0.009***<br>(0.001)  |                    |                  |
| Relative humidity, lagged 2 week               |                    |                   |                     |                   | -0.004***<br>(0.001) | -0.004***<br>(0.001) |                    |                  |
| Relative humidity, lagged 3 week               |                    |                   |                     |                   | -0.003**<br>(0.001)  | -0.004**<br>(0.001)  |                    |                  |
| Relative humidity, 1 month                     |                    |                   |                     |                   |                      |                      | -0.002<br>(0.004)  | 0.003<br>(0.005) |
| Relative humidity <sup>2</sup>                 | 0.000**<br>(0.000) | 0.000<br>(0.000)  | 0.000***<br>(0.000) | 0.000<br>(0.000)  | 0.000***<br>(0.000)  | 0.000<br>(0.000)     |                    |                  |
| Relative humidity <sup>2</sup> , current week  |                    |                   | 0.000<br>(0.000)    | -0.000<br>(0.000) |                      |                      |                    |                  |
| Relative humidity <sup>2</sup> , lagged 1 week |                    |                   |                     |                   | -0.000***<br>(0.000) | -0.001***<br>(0.000) |                    |                  |

---

|                                                   |                     |                     |                     |                     |                     |                     |                     |                     |
|---------------------------------------------------|---------------------|---------------------|---------------------|---------------------|---------------------|---------------------|---------------------|---------------------|
| Relative humidity <sup>2</sup> , lagged<br>2 week |                     |                     |                     |                     | 0.000***<br>(0.000) | 0.000***<br>(0.000) |                     |                     |
| Relative humidity <sup>2</sup> , lagged<br>3 week |                     |                     |                     |                     | 0.000**<br>(0.000)  | 0.000*<br>(0.000)   |                     |                     |
| Relative humidity <sup>2</sup> , 1<br>month       |                     |                     |                     |                     |                     |                     | 0.000<br>(0.000)    | -0.000<br>(0.000)   |
| Inprice                                           | 0.238***<br>(0.001) | 0.226***<br>(0.002) | 0.238***<br>(0.001) | 0.226***<br>(0.002) | 0.238***<br>(0.001) | 0.226***<br>(0.002) | 0.238***<br>(0.001) | 0.226***<br>(0.002) |
| Fixed effects                                     |                     |                     |                     |                     |                     |                     |                     |                     |
| County*week                                       | Y                   | Y                   | Y                   | Y                   | Y                   | Y                   | Y                   | Y                   |
| State*year*month                                  | Y                   | Y                   | Y                   | Y                   | Y                   | Y                   | Y                   | Y                   |
| N                                                 | 25395497            | 19278726            | 25226932            | 19157396            | 24940700            | 18951915            | 24940700            | 18951915            |
| R <sup>2</sup>                                    | 0.453               | 0.383               | 0.453               | 0.383               | 0.453               | 0.383               | 0.453               | 0.383               |

Notes: Standard errors in parentheses are clustered to store level. Results weighted by the units sold per transaction. \* p<0.1, \*\* p<0.05, \*\*\* p<0.01. The CDD, HDD, and relative humidity multiplied by 10.

Supplementary Table 10 Heterogeneous effect, climate and electricity price

|             | (1)<br>Electricity price | (2)<br>CDD           | (3)<br>HDD          |
|-------------|--------------------------|----------------------|---------------------|
| CDD         | 0.000<br>(0.001)         | 0.008***<br>(0.002)  | 0.001<br>(0.001)    |
| CDD*group 2 | 0.002*<br>(0.001)        | -0.002<br>(0.002)    | 0.008***<br>(0.001) |
| CDD*group 3 | 0.008***<br>(0.001)      | -0.006***<br>(0.002) | 0.001<br>(0.002)    |
| HDD         | -0.001**<br>(0.001)      | 0.002***<br>(0.001)  | 0.001**<br>(0.001)  |
| HDD*group 2 | 0.003***                 | 0.001                | 0.001               |

|                                         |           |          |           |
|-----------------------------------------|-----------|----------|-----------|
|                                         | (0.001)   | (0.001)  | (0.001)   |
| HDD*group 3                             | 0.005***  | -0.001   | 0.001     |
|                                         | (0.001)   | (0.001)  | (0.001)   |
| Wind speed                              | -0.001    | -0.006** | 0.001     |
|                                         | (0.002)   | (0.003)  | (0.002)   |
| Wind speed*group 2                      | 0.004     | 0.006    | -0.003    |
|                                         | (0.003)   | (0.004)  | (0.003)   |
| Wind speed*group 3                      | -0.005    | 0.008**  | -0.004    |
|                                         | (0.003)   | (0.003)  | (0.003)   |
| Precipitation                           | 0.000     | -0.001** | 0.000     |
|                                         | (0.000)   | (0.001)  | (0.000)   |
| Precipitation*group 2                   | -0.001**  | -0.001   | -0.002*** |
|                                         | (0.001)   | (0.001)  | (0.001)   |
| Precipitation*group 3                   | -0.002*** | 0.002**  | -0.001    |
|                                         | (0.001)   | (0.001)  | (0.001)   |
| Relative humidity                       | -0.018*   | -0.002   | -0.002    |
|                                         | (0.009)   | (0.011)  | (0.006)   |
| Relative humidity*group 2               | 0.008     | -0.014   | -0.029**  |
|                                         | (0.014)   | (0.014)  | (0.014)   |
| Relative humidity*group 3               | 0.031***  | -0.005   | -0.003    |
|                                         | (0.012)   | (0.013)  | (0.012)   |
| Relative humidity <sup>2</sup>          | 0.001*    | -0.000   | 0.000     |
|                                         | (0.001)   | (0.001)  | (0.000)   |
| Relative humidity <sup>2</sup> *group 2 | -0.001    | 0.002**  | 0.003***  |
|                                         | (0.001)   | (0.001)  | (0.001)   |
| Relative humidity <sup>2</sup> *group 3 | -0.002*   | 0.001    | -0.000    |
|                                         | (0.001)   | (0.001)  | (0.001)   |
| lnprice                                 | 0.097***  | 0.097*** | 0.097***  |
|                                         | (0.005)   | (0.005)  | (0.005)   |
| Fixed effects                           |           |          |           |
| County*week                             | Y         | Y        | Y         |

| State*year*month | Y       | Y       | Y       |
|------------------|---------|---------|---------|
| N                | 1871472 | 1871326 | 1871326 |
| R <sup>2</sup>   | 0.187   | 0.187   | 0.187   |

Notes: Standard errors in parentheses are clustered to store level. Results weighted by the units sold per transaction. \* p<0.1, \*\* p<0.05, \*\*\* p<0.01. The CDD, HDD, and relative humidity multiplied by 10.

*Supplementary Table 11 Heterogeneous effect, socio-economic characteristics*

|                    | (1)<br>Income       | (2)<br>Education    | (3)<br>Ethnic        | (4)<br>Age         |
|--------------------|---------------------|---------------------|----------------------|--------------------|
| CDD                | 0.002<br>(0.001)    | 0.002*<br>(0.001)   | 0.004***<br>(0.001)  | 0.003**<br>(0.001) |
| CDD*group 2        | 0.001<br>(0.002)    | 0.001<br>(0.002)    | -0.002<br>(0.002)    | 0.000<br>(0.002)   |
| CDD*group 3        | 0.003*<br>(0.002)   | 0.003<br>(0.002)    | 0.001<br>(0.002)     | 0.003<br>(0.002)   |
| HDD                | -0.001<br>(0.001)   | -0.001<br>(0.001)   | 0.003***<br>(0.001)  | 0.000<br>(0.001)   |
| HDD*group 2        | 0.003***<br>(0.001) | 0.002**<br>(0.001)  | -0.001<br>(0.001)    | 0.001<br>(0.001)   |
| HDD*group 3        | 0.003***<br>(0.001) | 0.005***<br>(0.001) | -0.003***<br>(0.001) | 0.002<br>(0.001)   |
| Wind speed         | 0.002<br>(0.003)    | -0.003<br>(0.003)   | 0.005*<br>(0.003)    | 0.002<br>(0.003)   |
| Wind speed*group 2 | -0.002<br>(0.004)   | 0.006*<br>(0.004)   | -0.003<br>(0.004)    | -0.001<br>(0.004)  |
| Wind speed*group 3 | -0.002<br>(0.004)   | 0.002<br>(0.004)    | -0.013***<br>(0.004) | -0.004<br>(0.004)  |
| Precipitation      | -0.001<br>(0.001)   | 0.000<br>(0.001)    | -0.001<br>(0.001)    | -0.000<br>(0.001)  |

|                                         |                     |                     |                     |                     |
|-----------------------------------------|---------------------|---------------------|---------------------|---------------------|
| Precipitation*group 2                   | 0.001<br>(0.001)    | -0.002*<br>(0.001)  | -0.001<br>(0.001)   | -0.001<br>(0.001)   |
| Precipitation*group 3                   | -0.002**<br>(0.001) | -0.003**<br>(0.001) | -0.002**<br>(0.001) | -0.003**<br>(0.001) |
| Relative humidity                       | 0.013<br>(0.012)    | 0.002<br>(0.011)    | -0.003<br>(0.008)   | -0.001<br>(0.008)   |
| Relative humidity*group 2               | -0.017<br>(0.017)   | -0.001<br>(0.017)   | 0.009<br>(0.012)    | -0.008<br>(0.013)   |
| Relative humidity*group 3               | -0.040**<br>(0.016) | -0.026<br>(0.017)   | -0.028*<br>(0.014)  | -0.020<br>(0.018)   |
| Relative humidity <sup>2</sup>          | -0.001<br>(0.001)   | 0.000<br>(0.001)    | 0.001<br>(0.001)    | 0.000<br>(0.001)    |
| Relative humidity <sup>2</sup> *group 2 | 0.002<br>(0.001)    | 0.001<br>(0.001)    | -0.001<br>(0.001)   | 0.000<br>(0.001)    |
| Relative humidity <sup>2</sup> *group 3 | 0.003***<br>(0.001) | 0.002<br>(0.001)    | 0.002<br>(0.001)    | 0.002<br>(0.001)    |
| lnprice                                 | 0.080***<br>(0.005) | 0.080***<br>(0.005) | 0.080***<br>(0.005) | 0.080***<br>(0.005) |
| Fixed effects                           |                     |                     |                     |                     |
| County*week                             | Y                   | Y                   | Y                   | Y                   |
| State*year*month                        | Y                   | Y                   | Y                   | Y                   |
| N                                       | 1474685             | 1474685             | 1474685             | 1474685             |
| R <sup>2</sup>                          | 0.208               | 0.208               | 0.208               | 0.208               |

Notes: Standard errors in parentheses are clustered to store level. Results weighted by the units sold per transaction. \* p<0.1, \*\* p<0.05, \*\*\* p<0.01. The CDD, HDD, and relative humidity multiplied by 10.

Supplementary Table 12 Heterogeneous effect, housing characteristics

|             | (1)<br>Rooms       | (2)<br>Owner       | (3)<br>Fuel         |
|-------------|--------------------|--------------------|---------------------|
| CDD         | 0.003**<br>(0.001) | 0.003**<br>(0.001) | 0.006***<br>(0.002) |
| CDD*group 2 | 0.002              | 0.000              | -0.003*             |



|                                         |          |           |           |
|-----------------------------------------|----------|-----------|-----------|
|                                         | (0.002)  | (0.002)   | (0.002)   |
| CDD*group 3                             | 0.002    | 0.004*    | -0.005*** |
|                                         | (0.002)  | (0.002)   | (0.002)   |
| HDD                                     | 0.002*   | 0.003***  | 0.002**   |
|                                         | (0.001)  | (0.001)   | (0.001)   |
| HDD*group 2                             | -0.001   | -0.001    | -0.000    |
|                                         | (0.001)  | (0.001)   | (0.001)   |
| HDD*group 3                             | 0.000    | -0.003**  | -0.001    |
|                                         | (0.001)  | (0.001)   | (0.001)   |
| Wind speed                              | 0.001    | 0.003     | -0.001    |
|                                         | (0.002)  | (0.003)   | (0.003)   |
| Wind speed*group 2                      | -0.002   | -0.001    | 0.004     |
|                                         | (0.004)  | (0.003)   | (0.004)   |
| Wind speed*group 3                      | -0.004   | -0.009**  | 0.000     |
|                                         | (0.004)  | (0.004)   | (0.003)   |
| Precipitation                           | -0.000   | 0.000     | -0.002*** |
|                                         | (0.001)  | (0.001)   | (0.001)   |
| Precipitation*group 2                   | -0.003** | -0.003*** | -0.000    |
|                                         | (0.001)  | (0.001)   | (0.001)   |
| Precipitation*group 3                   | -0.001   | -0.002*   | 0.003***  |
|                                         | (0.001)  | (0.001)   | (0.001)   |
| Relative humidity                       | 0.005    | 0.011     | -0.036*** |
|                                         | (0.007)  | (0.007)   | (0.013)   |
| Relative humidity*group 2               | -0.036** | -0.027**  | 0.042***  |
|                                         | (0.015)  | (0.012)   | (0.015)   |
| Relative humidity*group 3               | -0.042** | -0.057*** | 0.043***  |
|                                         | (0.017)  | (0.014)   | (0.017)   |
| Relative humidity <sup>2</sup>          | -0.000   | -0.001    | 0.003***  |
|                                         | (0.001)  | (0.001)   | (0.001)   |
| Relative humidity <sup>2</sup> *group 2 | 0.003**  | 0.002**   | -0.004*** |
|                                         | (0.001)  | (0.001)   | (0.001)   |
| Relative humidity <sup>2</sup> *group 3 | 0.003**  | 0.005***  | -0.004*** |

|                  |          |          |          |
|------------------|----------|----------|----------|
|                  | (0.001)  | (0.001)  | (0.001)  |
| Inprice          | 0.081*** | 0.081*** | 0.081*** |
|                  | (0.005)  | (0.005)  | (0.005)  |
| Fixed effects    |          |          |          |
| County*week      | Y        | Y        | Y        |
| State*year*month | Y        | Y        | Y        |
| N                | 1474685  | 1474685  | 1474685  |
| R <sup>2</sup>   | 0.208    | 0.208    | 0.208    |

Notes: Standard errors in parentheses are clustered to store level. Results weighted by the units sold per transaction. \* p<0.1, \*\* p<0.05, \*\*\* p<0.01. The CDD, HDD, and relative humidity multiplied by 10.

Supplementary Table 13 Heterogeneous effect, climate attitude

|             | (1)                                       | (2)                                     | (3)                              | (4)                                         | (5)                                         | (6)                            |
|-------------|-------------------------------------------|-----------------------------------------|----------------------------------|---------------------------------------------|---------------------------------------------|--------------------------------|
|             | Believe<br>climate<br>change<br>happening | Believe<br>climate<br>change<br>harm US | Worry about<br>climate<br>change | Support<br>renewable<br>energy<br>standards | Support<br>regulation of<br>CO <sub>2</sub> | Support<br>Democratic<br>party |
| CDD         | 0.003***<br>(0.001)                       | 0.001<br>(0.001)                        | 0.003***<br>(0.001)              | 0.003***<br>(0.001)                         | 0.002**<br>(0.001)                          | 0.002**<br>(0.001)             |
| CDD*group 2 | 0.002<br>(0.001)                          | 0.003**<br>(0.001)                      | 0.000<br>(0.001)                 | 0.002<br>(0.001)                            | 0.001<br>(0.001)                            | 0.002*<br>(0.001)              |
| CDD*group 3 | 0.002<br>(0.001)                          | 0.004***<br>(0.001)                     | 0.004***<br>(0.001)              | 0.002<br>(0.001)                            | 0.004***<br>(0.001)                         | 0.003**<br>(0.001)             |
| HDD         | -0.000<br>(0.001)                         | -0.000<br>(0.001)                       | -0.001<br>(0.001)                | -0.001<br>(0.001)                           | -0.001<br>(0.001)                           | 0.001<br>(0.001)               |
| HDD*group 2 | 0.002***<br>(0.001)                       | 0.002***<br>(0.001)                     | 0.003***<br>(0.001)              | 0.003***<br>(0.001)                         | 0.002***<br>(0.001)                         | 0.002***<br>(0.001)            |
| HDD*group 3 | 0.004***<br>(0.001)                       | 0.004***<br>(0.001)                     | 0.004***<br>(0.001)              | 0.004***<br>(0.001)                         | 0.004***<br>(0.001)                         | 0.001<br>(0.001)               |
| Wind speed  | -0.000<br>(0.002)                         | 0.000<br>(0.002)                        | -0.001<br>(0.002)                | -0.001<br>(0.002)                           | 0.001<br>(0.002)                            | -0.001<br>(0.002)              |



Notes: Standard errors in parentheses are clustered to store level. Results weighted by the units sold per transaction. \*  $p < 0.1$ , \*\*  $p < 0.05$ , \*\*\*  $p < 0.01$ . The CDD, HDD, and relative humidity multiplied by 10.
